# Supplementary material for: Double-layer structure of the Pt(111)–aqueous electrolyte interface
Source: PubMed Central journal article supplement — Proc Natl Acad Sci U S A. 2022 Jan 18;119(3):e2116016119. doi: 10.1073/pnas.2116016119 (PMC8784099; doi:10.1073/pnas.2116016119), 2022-01-18
Supplement: pnas.2116016119.sapp.pdf [file pnas.2116016119.sapp.pdf]

# Supporting Information

## Double layer structure of the Pt(111)-aqueous electrolyte interface

Kasinath Ojha, Katharina Doblhoff-Dier and Marc T. M. Koper\*

*Leiden Institute of Chemistry, Leiden University, 2300 RA Leiden, The Netherlands.*

\* Corresponding author: [m.koper@chem.leidenuniv.nl](mailto:m.koper@chem.leidenuniv.nl)

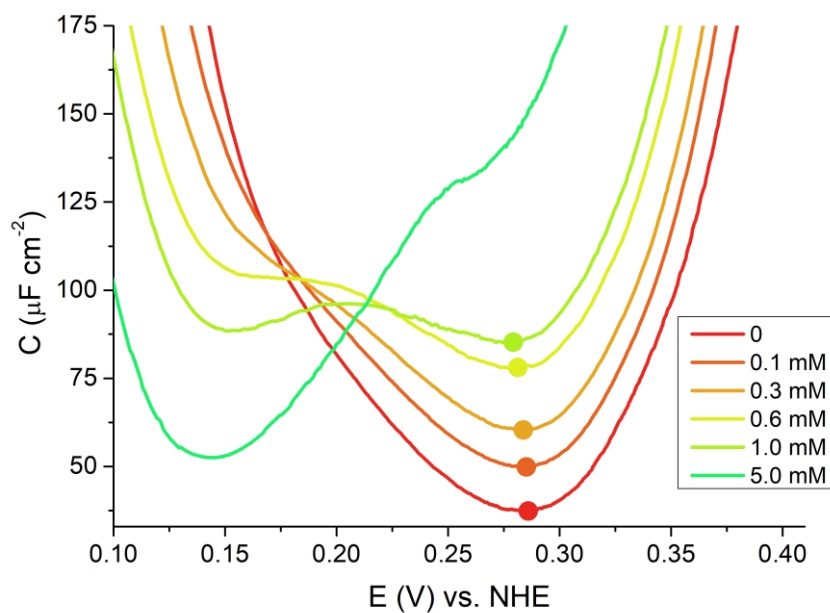

Figure S1. Double layer capacitance curves of Pt(111) in 0.1 mM HF + x mM LiF on the NHE scale after correcting for the corresponding pH at different concentrations of LiF.

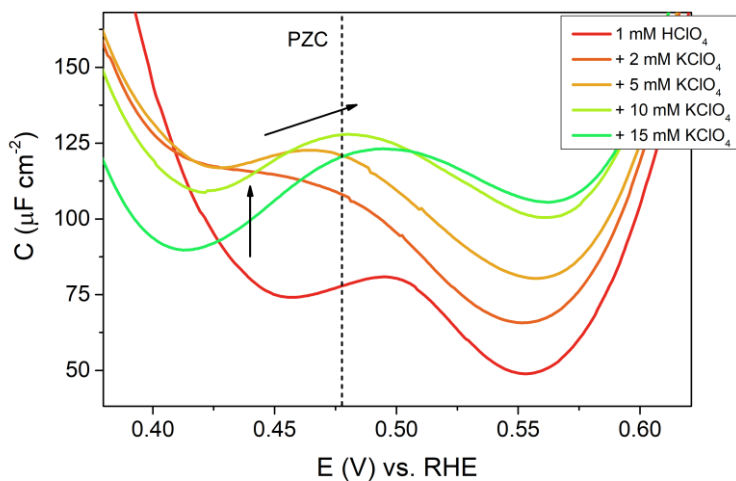

Figure S2. Capacitance curves of Pt(111) at 1 mM HClO<sub>4</sub> + x mM KClO<sub>4</sub> electrolyte (x = 0-15 mM).

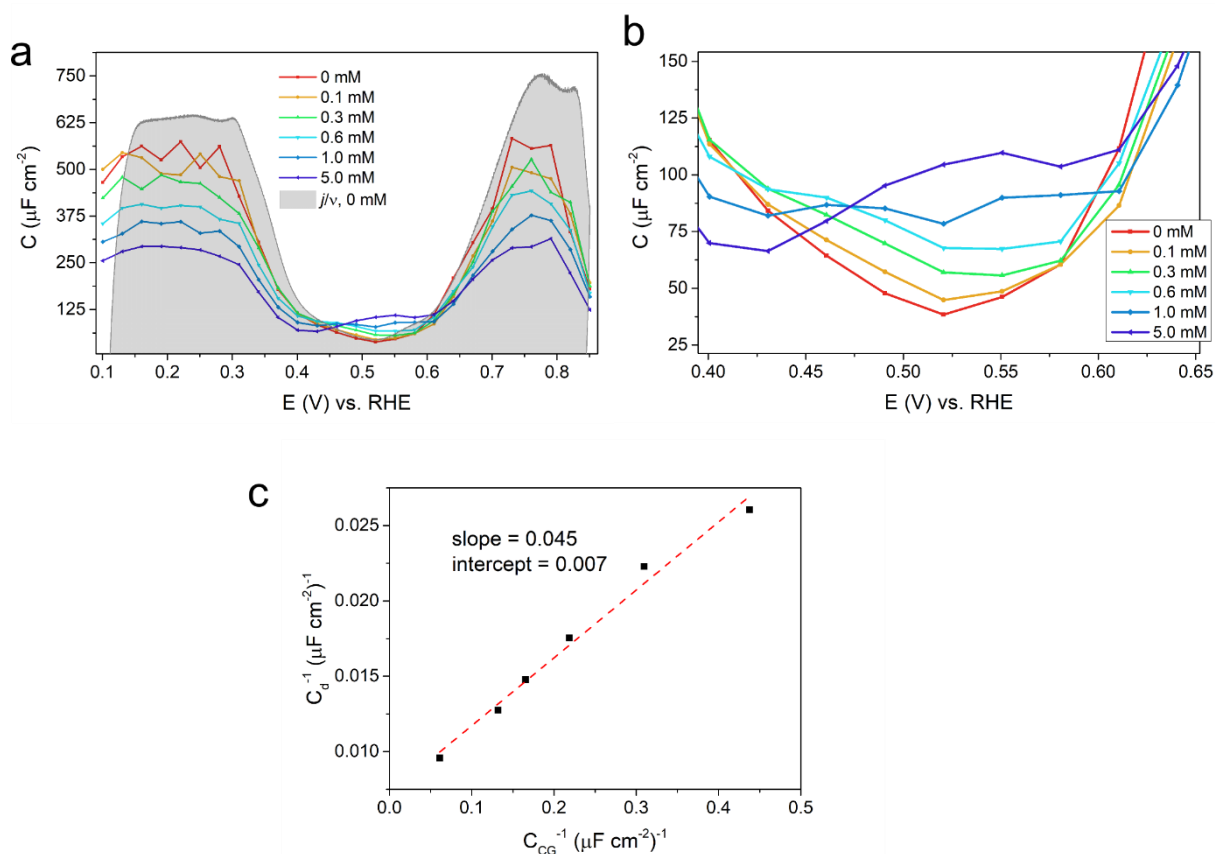

Figure S3. (a) Capacitance values of Pt (111) at pH 4 in 0.1 mM HClO<sub>4</sub> + x mM NaClO<sub>4</sub> electrolyte measured by Impedance technique at an applied fixed frequency of 18 Hz at different potentials. Shaded area is the overlay of capacitance curve obtained from cyclic

voltammograms at the scan rate of 10 mV/s. (b) magnified double layer region and (c) PZ plot obtained from the capacitance values at 0.52 V vs. RHE from the capacitance curves at 18 Hz.

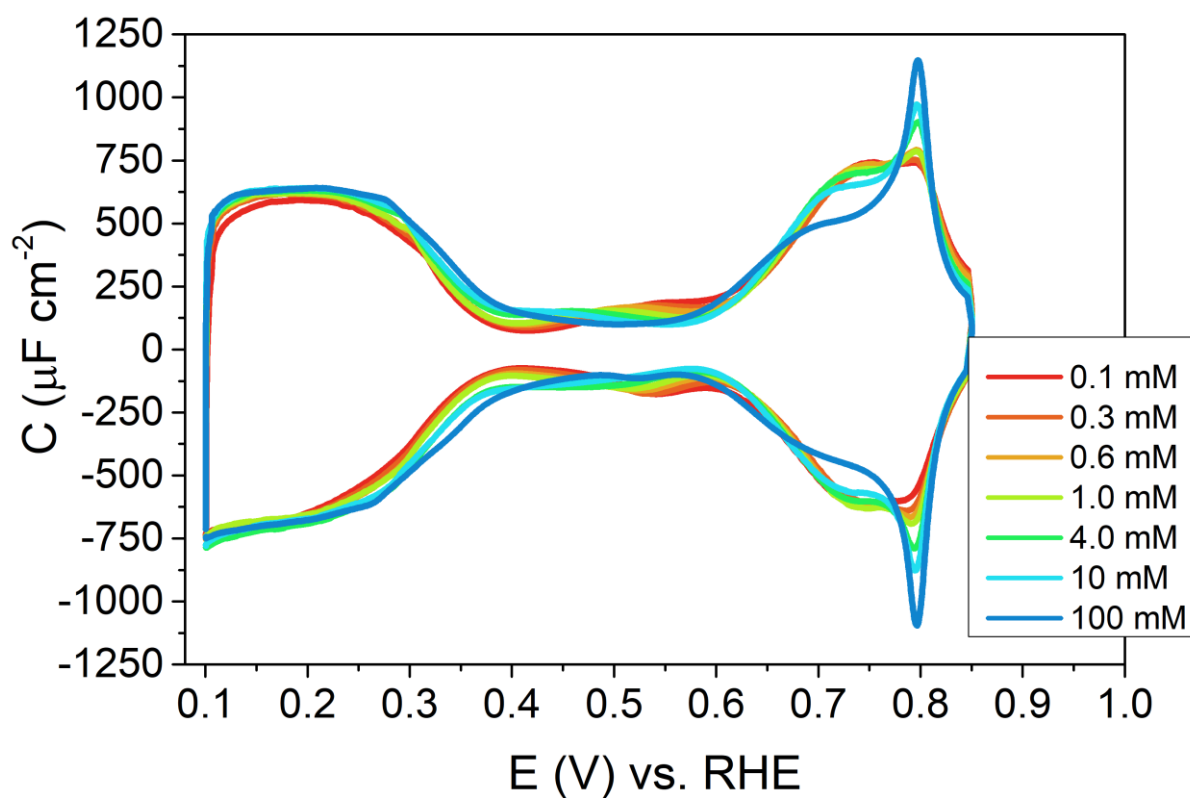

Figure S4. CV curves of Pt(111) in 5mM CsClO<sub>4</sub> + x mM HClO<sub>4</sub> (x = 0.1 to 100 mM).
